# Supplementary material
Source: PubMed Central journal article supplement (PMC7751897)
Supplement: NIHMS1632637-supplement-1.pdf [file NIHMS1632637-supplement-1.pdf]

## ONLINE SUPPLEMENT

Ronald L. Simons et al. "Childhood Adversities Amplify the Association between Adult Stressors and Inflammation in a Domain Specific Manner: Nuancing the Early Life Sensitivity Model"

### A. The Balance of Pro- to Anti-inflammatory Cytokines Predicts Illness

The ratio of pro- to anti-inflammatory cytokines has been linked to a variety of illnesses including cardiovascular disease (Anguera et al. 2002; Chen et al. 2010; Kelic et al. 2006; Libby et al., 2016; Taniguchi et al. 1999), cancer (Kumar et al. 2015; Lin and Lin, 2016), immunity (Dodoo et al. 2002; Sahiratmada et al. 2007), asthma (Gosset et al. 1999); substance abuse (Zago et al. 2016), and depression (Dhabhar et al. 2009; Taraz et al. 2012). Further, Calegari et al. (2018) recently reported that exercise training improves the IL-10/TNF $\alpha$  cytokine balance. All of this points to the importance of balance in the expression of pro- and anti-inflammatory cytokines. Based on this observation and as described in more detail in the measures section, the inflammatory index used in the present study involved summing across pro- and anti-inflammatory cytokines, respectively, and then calculating the ratio of these two summary scores.

#### References:

- Anguera, I., Miranda-Guardiola, F., Bosch, X., Eilella, X. Sitges, M., Mrin, J.L., Betriu, A., & Sanz, G. (2002). Elevation of serum levels of the anti-inflammatory cytokine interleukin-10 and decreased risk of coronary events in patients with unstable angina. *American Heart Journal*, 144, 811-817.
- Calegari, L., Nunes, R.B., Mozzaquattro, B.B., Rossato, D.D., & Lago, P.D. (2018). Exercise training improves the IL-10/TNF $\alpha$  cytokine balance in the gastrocnemius rats with heart failure. *Brazilian Journal of Physical Therapy*, 22, 154-160.
- Chen, G., Nayan, M., Duong, M., Asenjo, J-F., Ge, Y., Chiu, C-J., & Shum-Tim, D. (2010). Marrow stromal cells for cell-based therapy: The role of anti-inflammatory cytokines in cellular cardiomyoplasty. *Annals of Thoracic Surgery*, 90, 190-198.
- Dhabhar, F.S., Burke, H.M., Epel, E.S., Mellon, S.H., Rosser, R., Reus, V.I., & Wolkowitz, O.M. (2009). Low serum IL-10 concentrations and loss of regulatory association between IL-6 and IL-10 in adults with major depression. *Journal of Psychiatric Research*, 43, 962-969.

Dodoo, D., Omer, F.M., Todd, J., Akanmori, B.D., Koram, K.A., & Riley, E.M. (2002). Absolute levels and ratios of proinflammatory and anti-inflammatory cytokine production in vitro predict clinical immunity to *Plasmodium falciparum* malaria. *Journal of Infectious Disease*, 185, 971-979.

Gosset, P., Tillie-Leblond, I., Oudin, S., Parmentier, O., Wallaert, B., Joseph, M., & Tonnel, A-B. (1997). Production of chemokines and proinflammatory and anti-inflammatory cytokines by human alveolar macrophages activated by IgE receptors. *Journal of Allergy and Clinical Immunology*, 103, 289-297.

Kilic, T., Ural, D., Ural, E., Yumuck, Z., Agacdiken, A., Sahin, T., Kahraman, G., Kozdag, G., Vural, A., & Komsuoglu, B. (2006). Relation between proinflammatory to anti-inflammatory cytokine ratios and long-term prognosis in patients with non-ST elevation acute coronary syndrome. *Heart*, 92, 1041-1046.

Kumar, S., Kumari, N., Mittal, R.D., Mohindra, S., & Ghoshal, U.C. (2015). Association between pro-(IL8) and anti-inflammatory (IL-10) cytokine variants and their serum levels in *H. pylori*-related gastric carcinogenesis in northern India. *Meta Gene*, 6, 9-16.

Lin, H-C., & Lin, J-Y. (2016). Immune cell-conditioned media suppress prostate cancer PC3 cell growth correlating with decreased proinflammatory/anti-inflammatory cytokine ratios in the media using 5 selected crude polysaccharides. *Integrative Cancer Therapies*, 15, NP13-NP25. <http://dx.doi.org/10.1177/1534735415627923>

Sahiratmadja, E., Alisjahbana, B., de Boer, T., Adnan, I., Maya, A. Danusantoso, H. et al. (2007). Dynamic changes in pro- and anti-inflammatory cytokine profiles and gamma interferon receptor signaling integrity correlate with tuberculosis disease activity and response to curative treatment. *Infection and Immunity*, 75, 820-829.

Takumi, T., Koido, Y., Aiboshi, J., Yamashita, T., Suzuki, S., & Kurokawa, A. (1999). The ratio of interleukin-6 to interleukin-10 correlates with severity in patients with chest and abdominal trauma. *American Journal of Emergency Medicine*, 17, 548-551.

Zago, A., Moreira, F.P., Jansen, K., Lhullier, A.C., da Silva, R.A., deOliveira, F., et al. (2016). Alcohol use disorder and inflammatory cytokines in a population sample of young adults. *Journal of Alcoholism & Drug Dependence*, 4:2. <http://dx.doi.org/10.4172/2329-6488.1000236>

## B. Psychometric Properties of the Cytokine Measure

Inflammation is a reflection of the activation of the cytokine system which consists of a variety of pro- and anti-inflammatory cytokines. It is difficult to assess given its complex, multifaceted nature. Further, ELISA assays tend to suffer from limited reliability. In the clinical setting, clinical centers routinely set their own diagnostic range for these assessments even when using the same diagnostic machinery as other centers. Indeed, when different batches of reagents are produced or choice of 510K approved platform is changed (e.g. from Bio-Rad to Roche) the normal range changes. In the research setting, the variability is probably even higher. For example, the results using a kit from one manufacturer to another manufacturer can vary dramatically. Finally, because of non-specific binding effects, the results obtained from multiplexing versus single plexing can differ. We assayed multiple cytokines in the current study in an attempt to minimize the variability of individual measurements on conclusions related to the relative inflammatory diathesis being assessed.

Cytokine measurement reproducibility was good (overall average intra-assay coefficients of variation for IL-1B, 3.2%; IL-4, 3.9%; IL-5, 4.4%; IL-6, 2.7% ; IL-7, 3.4%; IL-8, 6.2%; IL-10, 2.4%; IL-12, 3.2%; IL-13, 3%; IL-17, 3.5%; G-CSF, 4.4%; MIP-1 $\beta$  = 3.6%; TNF- $\alpha$  = 2.8%; IFN- $\gamma$ , 3.6%). Raw scores for each cytokine are provided in Online Supplemental Table S1 which provides raw descriptive statistics for each inflammatory marker, including the range of values detected, the mean raw cytokine level and SD, and the coefficient of variability, and skewness. As expected, cytokine scores co-varied across all cytokines with an intra-class correlation of .740.

A number of individuals had non-detectable levels for several of the cytokines (see Table S1). To an extent, this is to be expected given that the sample consists of young adults for whom low inflammation is a normal or baseline state. It is also the case, however, that multiplex platforms tend to have higher rates of none detection than the high sensitivity single-plex approach. Indeed most of the 14 cytokines included in our analysis demonstrated a skewed distribution where many individuals had no detectable level, some had a detectable level, and a few had very high levels (see mean, SD, and skewness for each cytokine as reported in Supplemental Table 1 and distribution of scores in Figure 1).

**Supplemental Table S1.** Table of intra-assay coefficient of variation (CV%) at each standard, mean raw cytokine levels (and SD) for each cytokine, range of values detected, and skewness

| Cytokine      | S1   | S2   | S3   | S4   | S5   | S6   | S7   | S8    | Mean (SD)<br>of CV | Assay working ranges, pg/r<br>LLOQ | ULOQ     | Mean (SD) of<br>raw value<br>pg/ml | % undetectable | Skewness |
|---------------|------|------|------|------|------|------|------|-------|--------------------|------------------------------------|----------|------------------------------------|----------------|----------|
| IL-1 $\beta$  | 0.86 | 1.54 | 2.22 | 1.38 | 1.86 | 4.68 | 4.47 | 8.25  | 3.16<br>(2.50)     | 0.3                                | – 5,386  | 0.38<br>(3.15)                     | 57.87          | 18.64    |
| IL-4          | 1.32 | 1.17 | 2.79 | 2.11 | 4.49 | 4.22 | 6.01 | 8.88  | 3.88<br>(2.63)     | 0.2                                | – 3,484  | 0.13<br>(2.02)                     | 92.74          | 20.07    |
| IL-5          | 0.45 | 1.16 | 2.02 | 2.10 | 3.10 | 7.00 | 7.11 | 12.31 | 4.41<br>(4.06)     | 0.6                                | – 14,775 | 1.36<br>(7.55)                     | 80.15          | 11.65    |
| IL-6          | 0.84 | 1.31 | 1.27 | 1.81 | 2.63 | 3.89 | 4.90 | 4.72  | 2.67<br>(1.63)     | 1.3                                | – 23,266 | 13.18<br>(147.20)                  | 82.81          | 17.68    |
| IL-7          | 1.06 | 0.72 | 2.05 | 1.97 | 3.85 | 4.54 | 6.01 | 7.31  | 3.44<br>(2.39)     | 0.5                                | – 11,986 | 3.76<br>(14.64)                    | 20.82          | 15.65    |
| IL-8          | 4.43 | 3.60 | 5.14 | 2.33 | 5.81 | 6.93 | 9.48 | 11.96 | 6.21<br>(3.18)     | 1.3                                | – 25,143 | 14.83<br>(114.00)                  | 9.20           | 17.02    |
| L-10          | 1.88 | 1.16 | 1.10 | 2.35 | 1.84 | 2.92 | 3.66 | 4.05  | 2.37<br>(1.10)     | 3.4                                | – 55,895 | 36.70<br>(335.93)                  | 18.89          | 14.25    |
| IL-12         | 1.48 | 1.15 | 2.78 | 1.34 | 2.21 | 4.76 | 4.54 | 7.47  | 3.22<br>(2.21)     | 2.3                                | – 38,759 | 31.32<br>(424.74)                  | 71.67          | 19.68    |
| IL-13         | 0.46 | 1.30 | 0.94 | 0.74 | 2.54 | 4.93 | 5.80 | 7.51  | 3.03<br>(2.70)     | 0.3                                | – 5,925  | 2.38<br>(22.61)                    | 47.70          | 17.67    |
| IL-17         | 1.53 | 1.14 | 4.85 | 2.71 | 2.65 | 3.98 | 4.12 | 7.04  | 3.50<br>(1.92)     | 1.7                                | – 35,460 | 4.63<br>(18.49)                    | 86.92          | 5.48     |
| G-CSF         | 1.65 | 2.19 | 2.87 | 2.61 | 3.64 | 6.25 | 6.22 | 9.87  | 4.41<br>(2.81)     | 1.5                                | – 29,714 | 5.04<br>(26.91)                    | 69.25          | 14.94    |
| MIP-1 $\beta$ | 0.98 | 1.20 | 2.78 | 1.47 | 3.55 | 3.47 | 5.24 | 9.94  | 3.58<br>(2.95)     | 0.2                                | – 4,584  | 82.49<br>(58.88)                   | 1.21           | 3.17     |
| TNF- $\alpha$ | 1.29 | 1.05 | 1.37 | 2.20 | 2.74 | 3.47 | 3.83 | 6.76  | 2.84<br>(1.89)     | 3.0                                | – 52,606 | 12.57<br>(91.48)                   | 33.90          | 16.24    |
| IFN- $\gamma$ | 1.25 | 2.28 | 2.84 | 3.83 | 4.85 | 6.69 | 7.03 | ----  | 4.44<br>(2.20)     | 3.0                                | – 14,989 | 5.35<br>(58.34)                    | 91.77          | 17.12    |

**Supplemental Figure S1.** Distribution of scores for the categorical ratio inflammatory index.

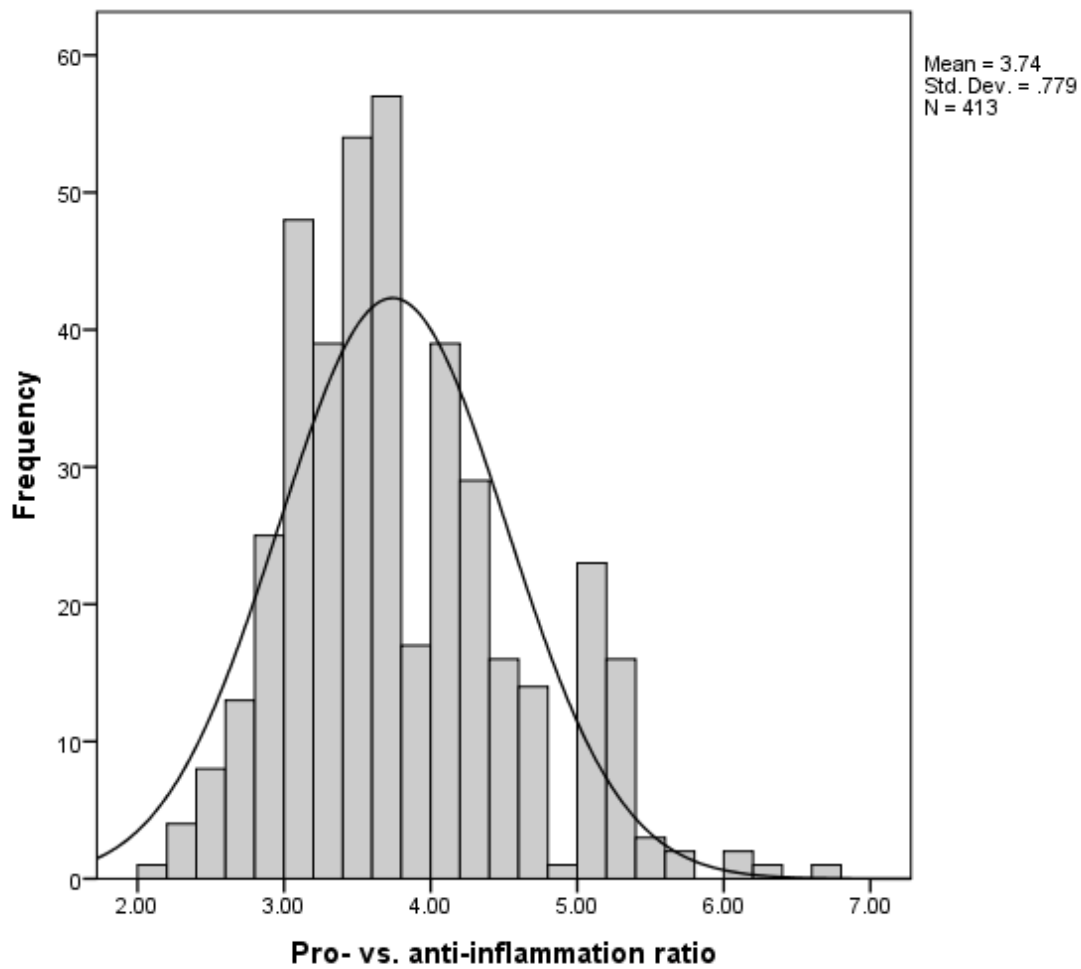

**Supplemental Table S2.** Correlation between Alternative measures of inflammation

|                               | 1      | 2      | 3      |
|-------------------------------|--------|--------|--------|
| 1. Categorical                | —      |        |        |
| 2. Ratio log transformed      | .847** | —      |        |
| 3. Difference log transformed | .915** | .933** | —      |
| 4. IL6+TNF/IL10               | .670** | .553** | .668** |

Note:  $N = 413$ ; \*\* $p \leq .01$ ; \* $p \leq .05$  (two-tailed tests).
